# Supplementary material
Source: Springer Nature journal article supplement (https://www.springermedizin.de/resource/supplementary/12958_2006_349_MOESM1_ESM.pdf/9567684)
Supplement: MOESM1 [file 9567684]

**A- Tilapia Experiment**

| Groups   | Day 0       | Day 3                  | 5 | 11 |
|----------|-------------|------------------------|---|----|
| C        | c.o.        | c.o.                   |   |    |
| E        | c.o.        | 10mg/kg E <sub>2</sub> |   |    |
| I35      | 35mg/kg ICI | c.o.                   |   |    |
| I35E3d   | 35mg/kg ICI | 10mg/kg E <sub>2</sub> |   |    |
| I10E3d   | 10mg/kg ICI | 10mg/kg E <sub>2</sub> |   |    |
| Sampling |             | ●                      | ● | ●  |

**B- Sea bream experiment 1**

| Groups   | Day 0                  | Day 1 |
|----------|------------------------|-------|
| C        | c.o.                   |       |
| E        | 10mg/kg E <sub>2</sub> |       |
| I        | 10mg/kg ICI            |       |
| Sampling |                        | ●     |

**C- Sea bream experiment 2**

| Groups   | Day 0      | Day 3                                | 5 |
|----------|------------|--------------------------------------|---|
| C        | c.o.       | c.o.                                 |   |
| E1       | c.o.       | 1mg/kg E <sub>2</sub>                |   |
| E0.1     | c.o.       | 0.1mg/kg E <sub>2</sub>              |   |
| I        | c.o.       | 4mg/kg ICI                           |   |
| IE       | c.o.       | 4mg/kg ICI+<br>1mg/kg E <sub>2</sub> |   |
| IE3d     | 4mg/kg ICI | 1mg/kg E <sub>2</sub>                |   |
| Sampling |            |                                      | ● |
